# Supplementary material for: A designable magnetic MOF composite and facile coordination-based post-synthetic strategy for the enhanced removal of Hg2+ from water
Source: Royal Society of Chemistry journal article supplement (doi:10.1039/c5ta01484k), 2015-01-01
Supplement: c5ta01484k1.pdf [file c5ta01484k1.pdf]

## Electronic Supplementary Information

### **Designable magnetic MOF composite and facile coordination-based post-synthetic strategy for enhanced removal of Hg<sup>2+</sup> from water**

Lijin Huang, Man He, Beibei Chen, Bin Hu\*

Key Laboratory of Analytical Chemistry for Biology and Medicine (Ministry of Education), College of Chemistry and Molecular Sciences, Wuhan University, Wuhan, Hubei, 400372, China, Fax: 86-27-68754067, E-mail: binhu@whu.edu.cn

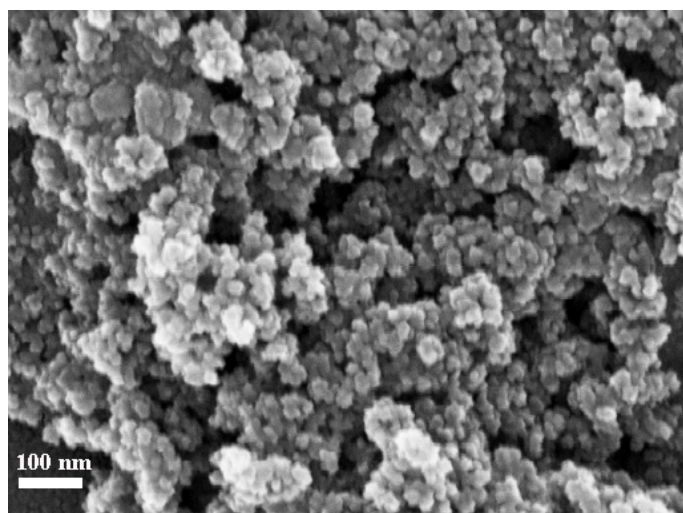

**Fig. S1.** SEM image of  $\text{Fe}_3\text{O}_4@\text{SiO}_2@\text{HKUST-1}$  (Note:  $\text{Fe}_3\text{O}_4@\text{SiO}_2$  NPs had a uniform size of about 20 nm.)

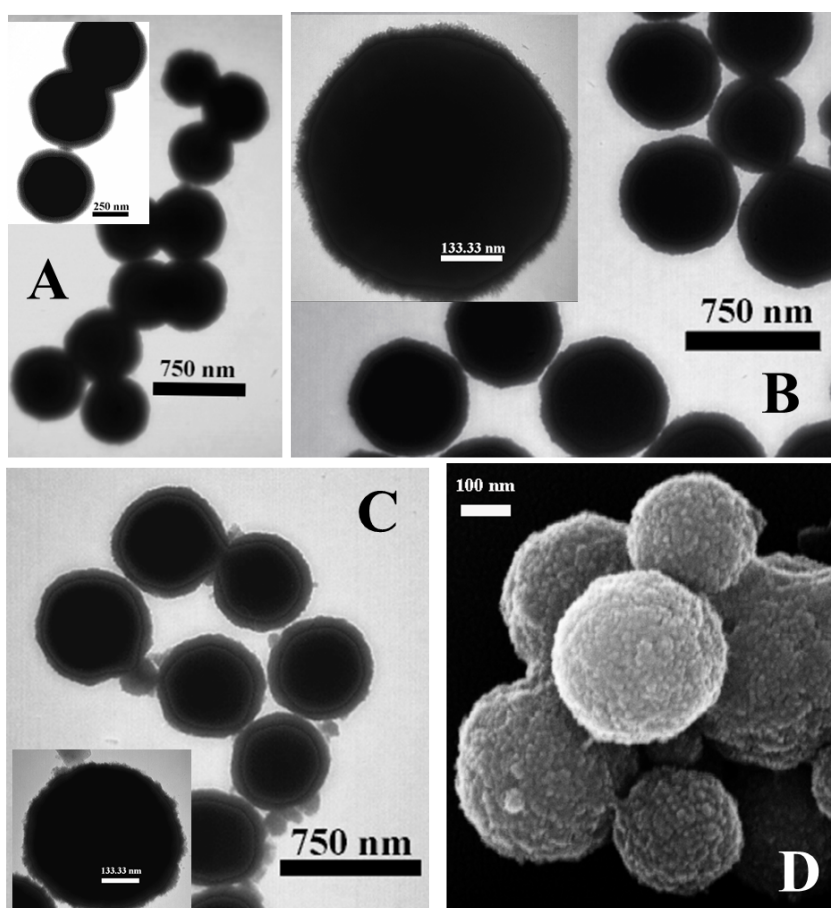

**Fig. S2.** TEM and SEM images of prepared magnetic micro-composites  
 (a)  $\text{Fe}_3\text{O}_4@\text{SiO}_2$ , (b)  $\text{Fe}_3\text{O}_4@\text{SiO}_2@\text{Cu}(\text{OH})_2$ , (c)  $\text{Fe}_3\text{O}_4@\text{SiO}_2@\text{HKUST-1}$  (The insets show the enlarge images), (d) SEM image of  $\text{Fe}_3\text{O}_4@\text{SiO}_2@\text{HKUST-1}$

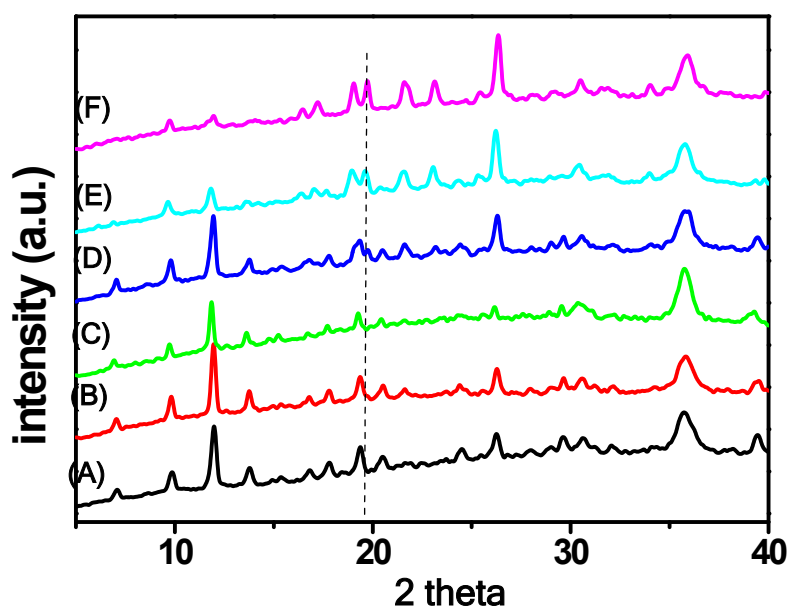

**Fig. S3** XRD patterns of the prepared Bi-I-functionalized  $\text{Fe}_3\text{O}_4@\text{SiO}_2@\text{HKUST-1}$  before spiking into aqueous solution (A); dispersed in  $10 \text{ mg L}^{-1} \text{ Hg}^{2+}$  solution at pH 3 for 10 min (B); 20 min (C); 30 min (D); 45 min (E); and 60 min (F).

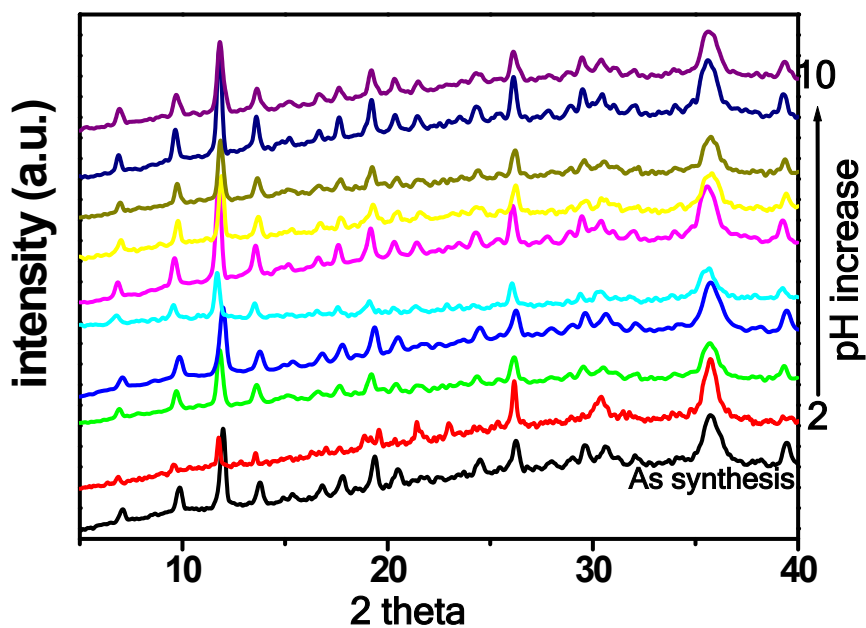

**Fig. S4** XRD patterns of the prepared Bi-I-functionalized  $\text{Fe}_3\text{O}_4@\text{SiO}_2@\text{HKUST-1}$  before and after mercury adsorption at different pH ( $\text{Hg}^{2+}$  concentration:  $10 \text{ mg L}^{-1}$ , exposure time: 20 min).

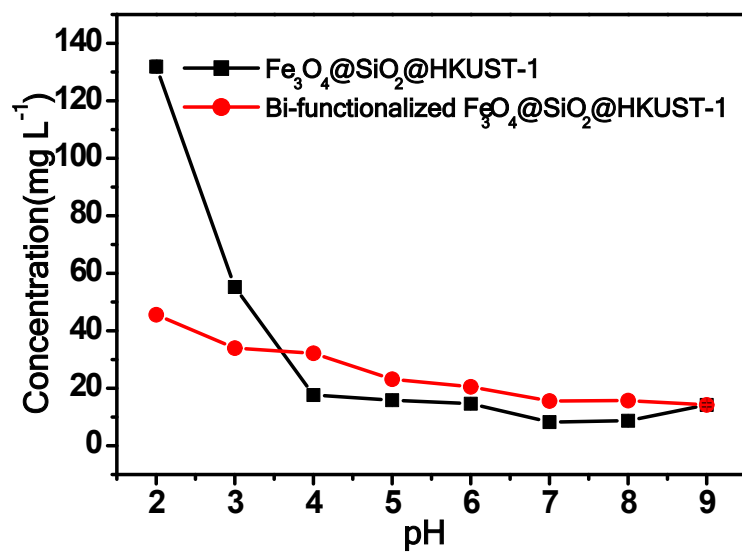

**Fig. S5** The effect of pH on the concentration of Cu<sup>2+</sup> in the solution after MSPE process with the prepared Fe<sub>3</sub>O<sub>4</sub>@SiO<sub>2</sub>@HKUST-1 and Bi-I-functionalized Fe<sub>3</sub>O<sub>4</sub>@SiO<sub>2</sub>@HKUST-1 (Hg<sup>2+</sup> concentration: 10 mg L<sup>-1</sup>, exposure time: 20 min).

**Preparation of 400 nm Fe<sub>3</sub>O<sub>4</sub> micro-spheres:**

Superparamagnetic Fe<sub>3</sub>O<sub>4</sub> nano/micro-spheres with tunable average sizes were synthesized according to a hydrothermal method<sup>1</sup>. Typically, FeCl<sub>3</sub>·6H<sub>2</sub>O (0.65 g, 4.0 mmol) and trisodium citrate (0.20 g, 0.68 mmol) were first dissolved in ethylene glycol (20 mL), afterward, NaAc (1.20 g) was added with stirring. The mixture was stirred vigorously for 30 min and then sealed in a Teflon-lined stainless-steel autoclave (50 mL capacity). The autoclave was heated at 200 °C and maintained for 10 h, and then allowed to cool to room temperature. The black products were washed with ethanol and deionized water for several times and then dispersed in water (16 mL).

**Synthesis of Fe<sub>3</sub>O<sub>4</sub>@SiO<sub>2</sub> Microspheres with Core/shell Nanostructure:**

The obtained Fe<sub>3</sub>O<sub>4</sub> microspheres were coated by a layer of SiO<sub>2</sub> shell. In particular, an aqueous solution (8 mL) of Fe<sub>3</sub>O<sub>4</sub> was diluted with water (8 mL) and ethanol (40 mL). The mixture was homogenized by ultrasonication for 30 min, prior to the addition of ammonia solution (1 mL). After 15 min, a solution of TEOS (200 μL) in ethanol (4 mL) was added dropwise into the solution. The reaction was performed for 12 h and that the product was collected by the help of a magnet and washed with ethanol and water for several times. Finally, the product of Fe<sub>3</sub>O<sub>4</sub>@SiO<sub>2</sub> microspheres with core/shell nanostructure was dispersed in water (10 mL).

**Preparation of Fe<sub>3</sub>O<sub>4</sub>@SiO<sub>2</sub>@Cu(OH)<sub>2</sub>:**

The Fe<sub>3</sub>O<sub>4</sub>@SiO<sub>2</sub>@Cu(OH)<sub>2</sub> microspheres were prepared by the conventional co-precipitation method. 5 mL aqueous solution of Fe<sub>3</sub>O<sub>4</sub>@SiO<sub>2</sub> was diluted with high purity water (200 mL), followed by the addition of 200 mg CuCl<sub>2</sub>·H<sub>2</sub>O. The mixture was ultrasounded for 20 min, and then adjusted pH to 9.0~10.0 by 1.0 mol L<sup>-1</sup> NaOH aqueous solution under vigorously stirring. The mixture was kept at 85 °C for 3 h. After cooling to room temperature the product was washed with water and ethanol sequentially for several times, and finally dried at 50 °C under vacuum overnight.

**Preparation of Fe<sub>3</sub>O<sub>4</sub>@SiO<sub>2</sub>@HKUST- 1:**

Fe<sub>3</sub>O<sub>4</sub>@SiO<sub>2</sub>@HKUST-1 composite was prepared according to Report<sup>2</sup> with minor modifications. 80 mg as-synthesized Fe<sub>3</sub>O<sub>4</sub>@SiO<sub>2</sub>@Cu(OH)<sub>2</sub> was dispersed in 1 mL high purity water, followed by the addition of 2 mL ethanol solution containing 126 mg H<sub>3</sub>BTC for transforming Cu(OH)<sub>2</sub> into HKUST-1. The mixture solution was then stirred for 12 h at room temperature. The products were washed several times with water and ethanol, then dried overnight at 150 °C under air atmosphere.

## Reference

1. Deng, Y.; Deng, C.; Qi, D.; Liu, C.; Liu, J.; Zhang, X.; Zhao, D., Synthesis of core/shell colloidal magnetic zeolite microspheres for the immobilization of trypsin. *Adv. Mater.*, 2009, **21**, 1377-1382.
2. Majano, G.; Perez-Ramirez, J., Scalable room-temperature conversion of copper(II) hydroxide into HKUST-1 (Cu<sub>3</sub>(btc)<sub>2</sub>). *Adv. Mater.*, 2013, **25**, 1052-1057.
